# Supplementary material for: A Comparison of Different Sample Processing Protocols for MALDI Imaging Mass Spectrometry Analysis of Formalin-Fixed Multiple Myeloma Cells
Source: MDPI journal article supplement (doi:10.3390/cancers15030974), 2023-02-03
Supplement: s1 [file s1]

A)

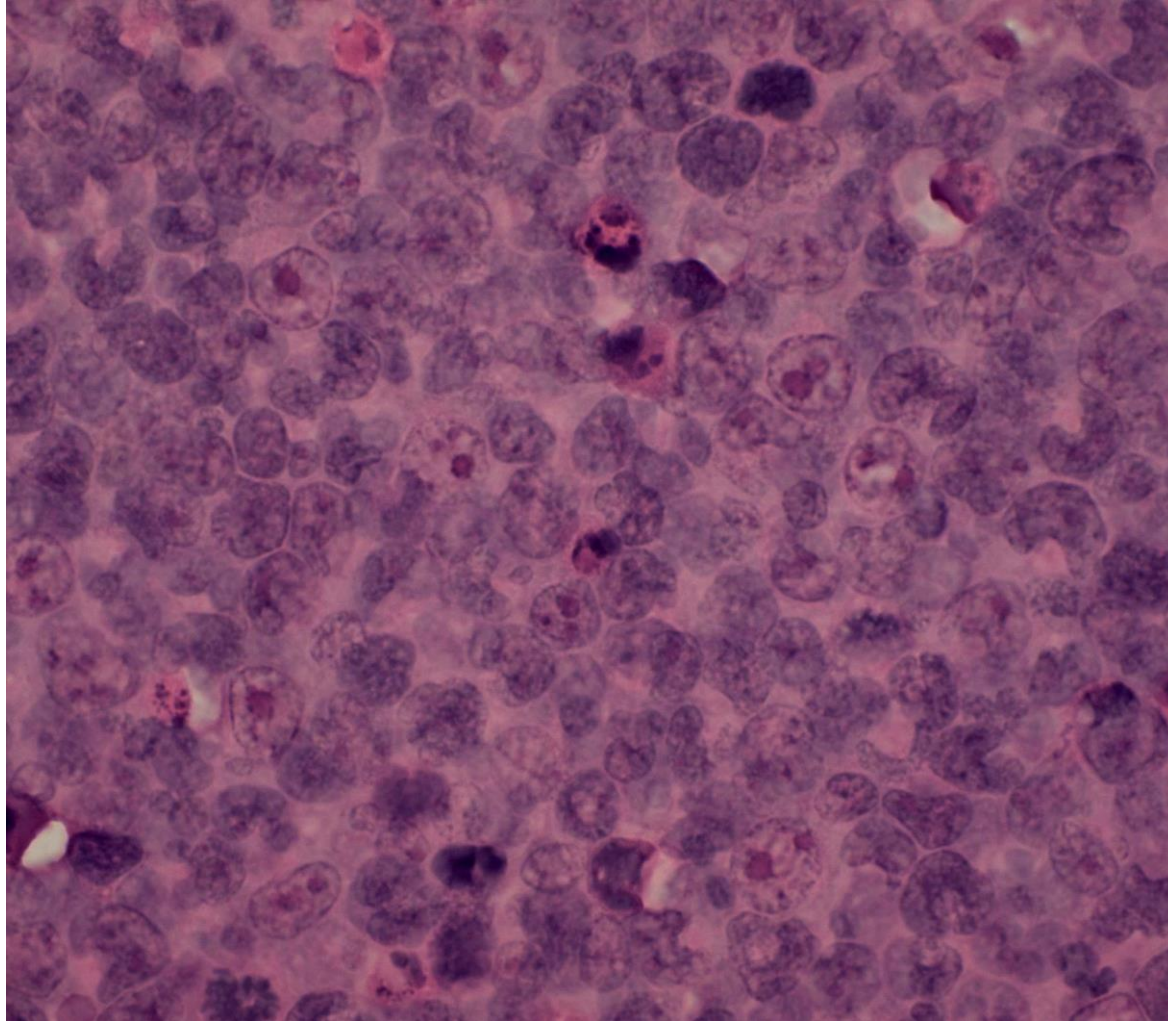

B)

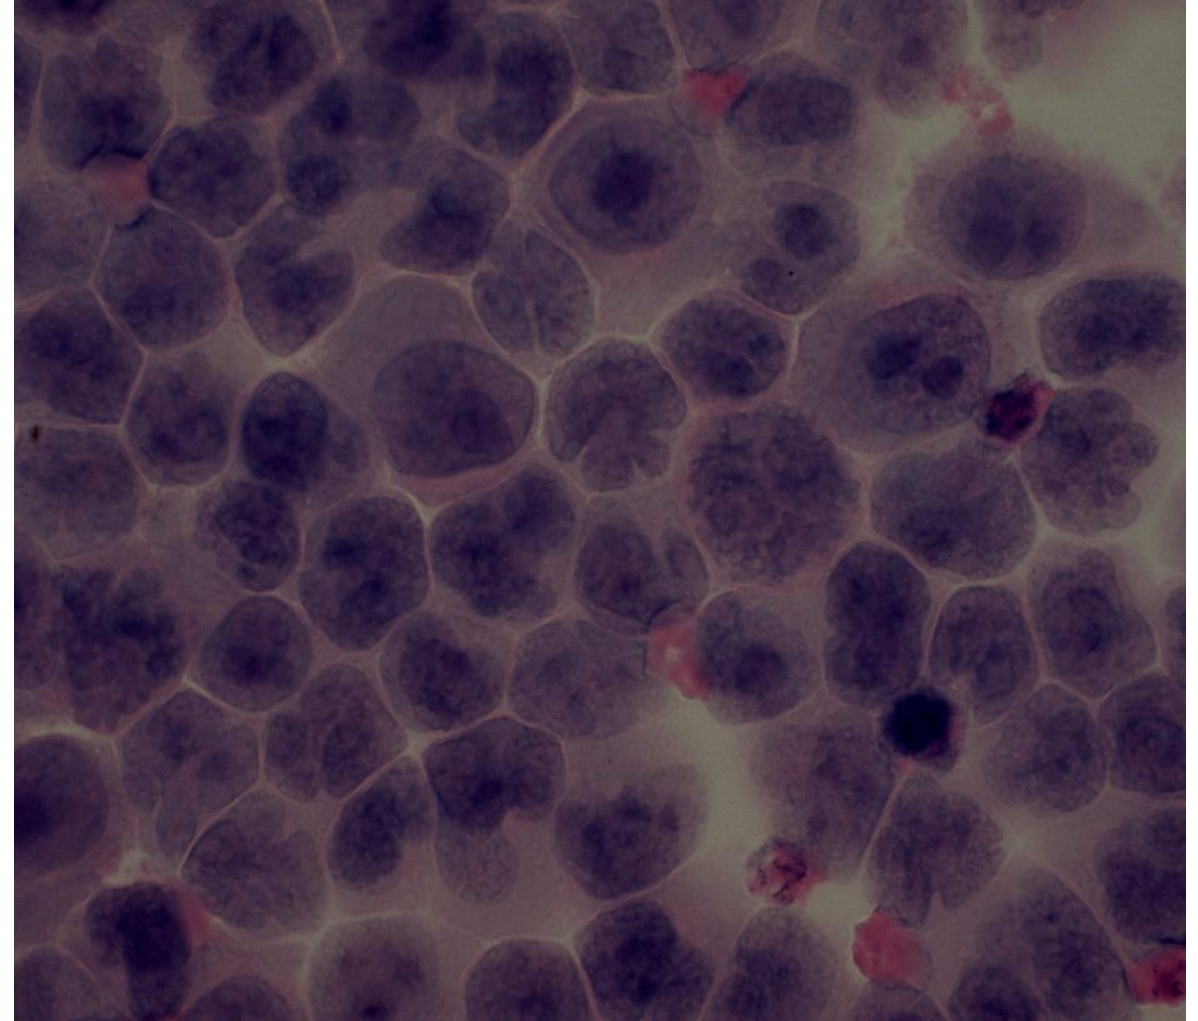

Figure S1. HE stained cells are represented for comparison between cells embedded in paraffin A) and cells centrifuged with cytopsin procedure B). 100x magnification.

A)

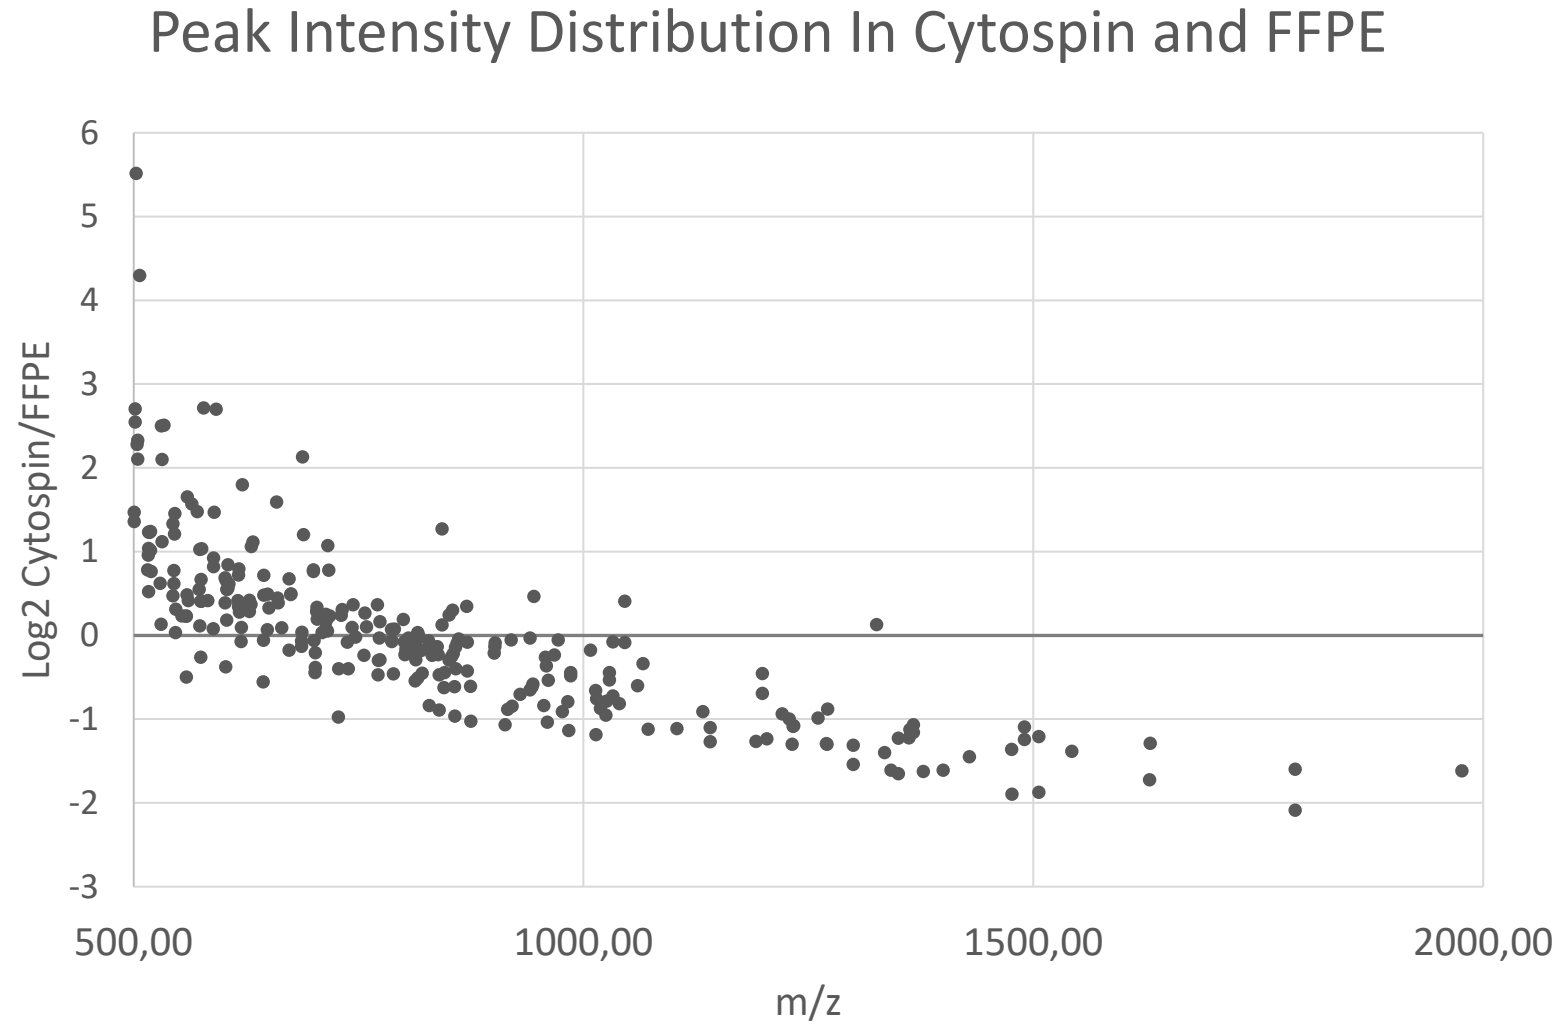

B)

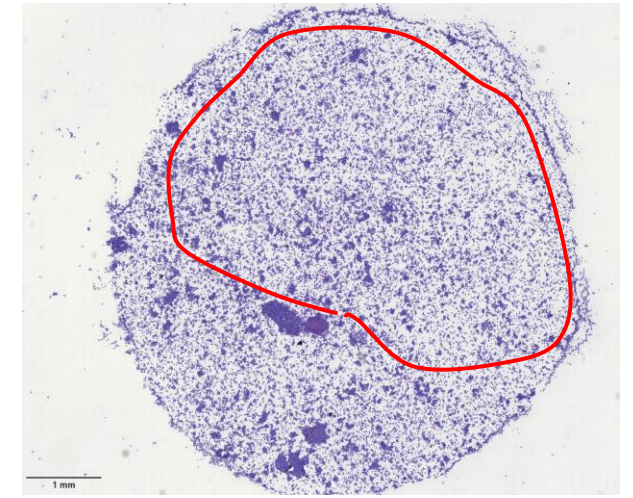

C)

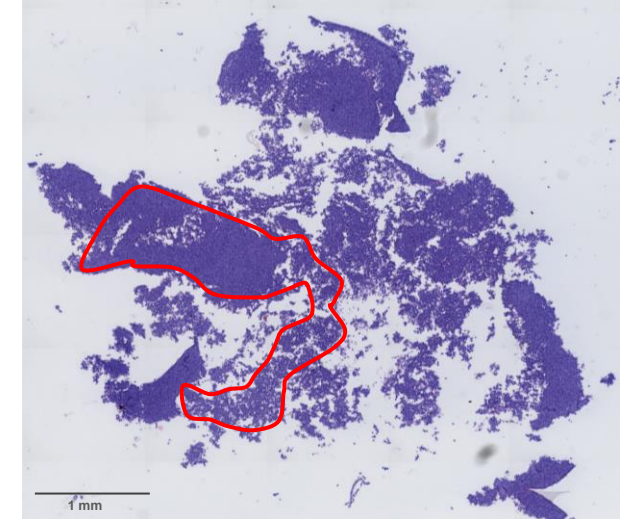

Figure S2. Peak intensity distribution in cytospin and FFPE samples through the  $m/z$  range 500-2000. A) Plot of  $\log_2$  cytospin/FFPE intensity (y-axis) vs. the mass range  $m/z$  500-2000 (x-axis) showing the peak height distribution (points in dark gray) in the  $m/z$  range considered, observed in the mean of 69 spectra from each cytospin and FFPE samples. B) Hematoxylin & Eosin staining of a cytospin sample showing a layer of sparsely packed cells. C) Hematoxylin & Eosin staining of a FFPE sample showing a layer of cells densely packed. Red lines in B) and C) indicate cell areas where the 69 spectra were randomly chosen.



A)

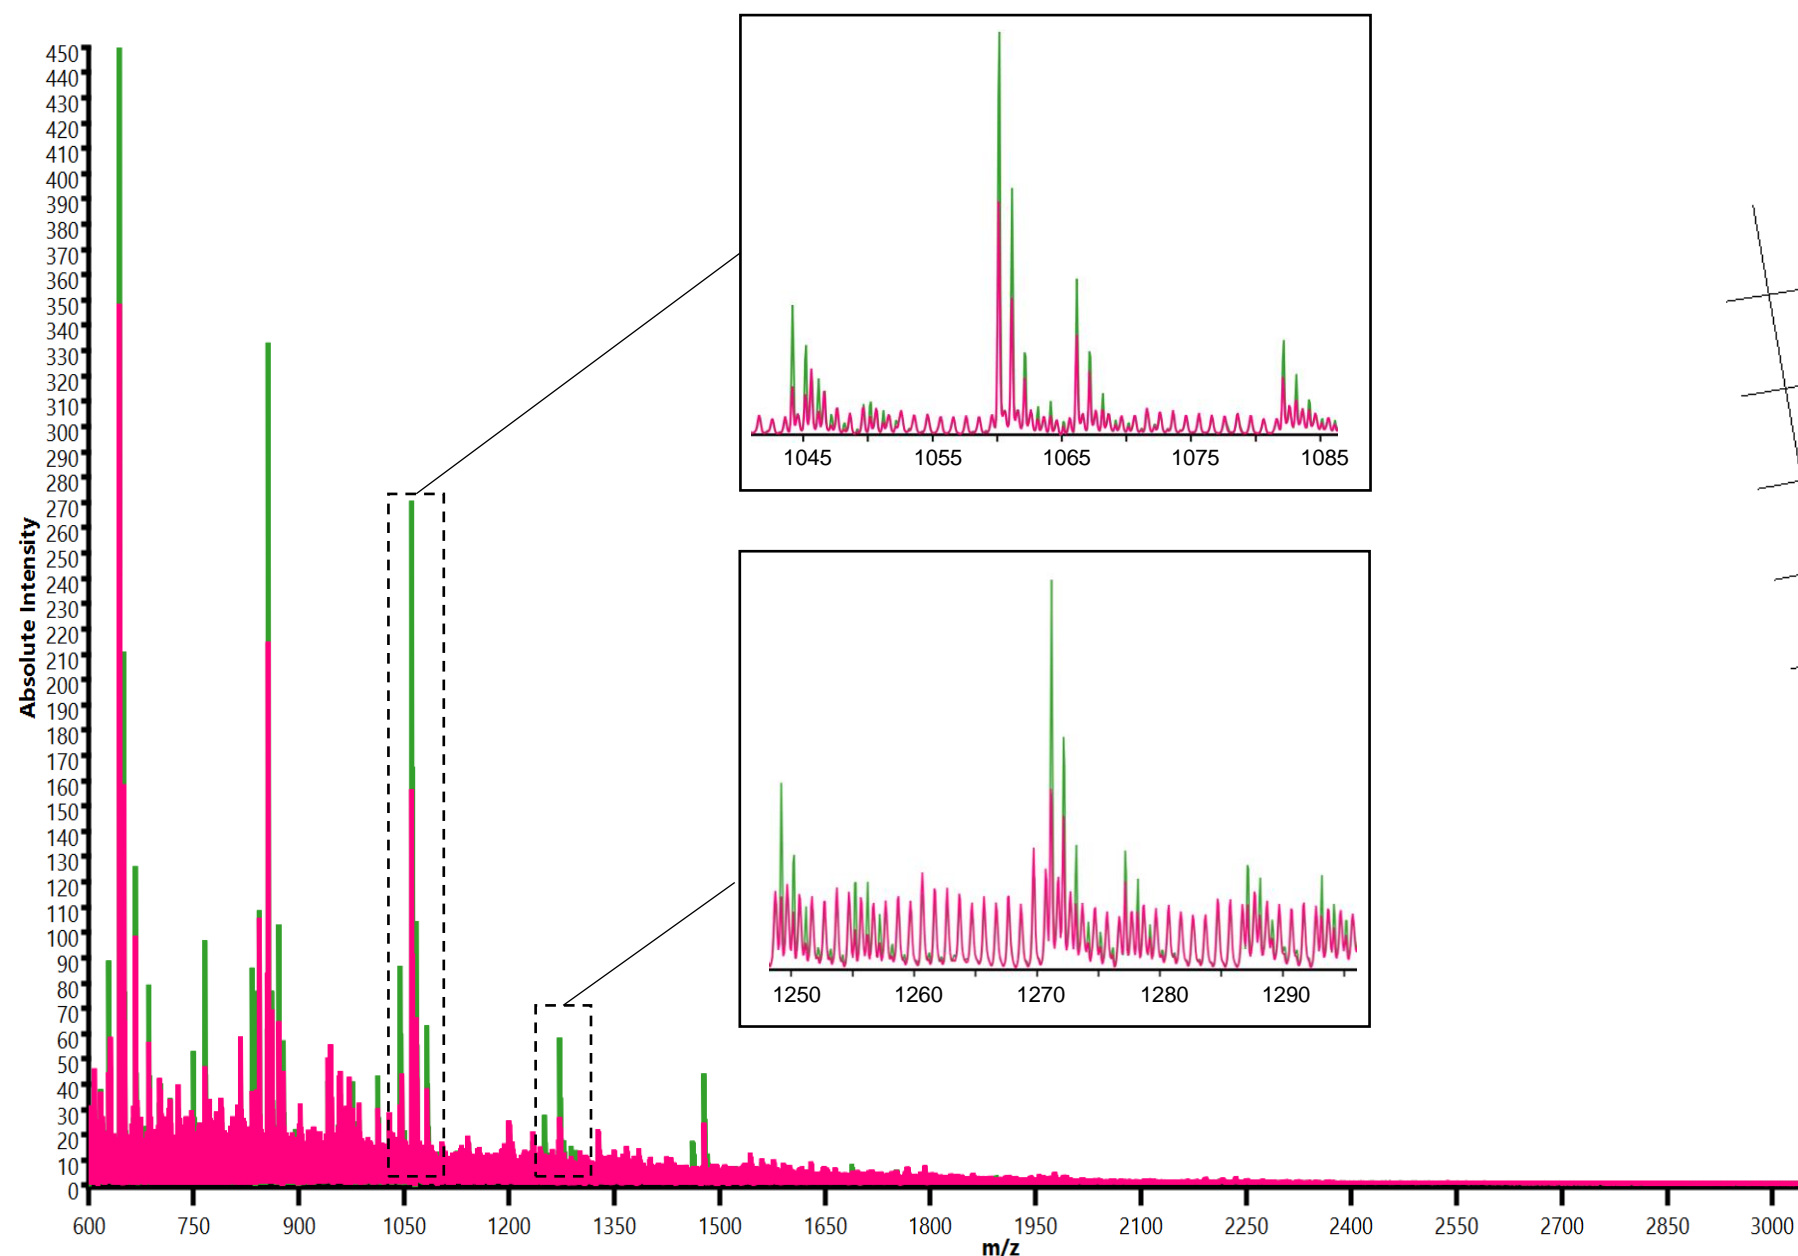

B)

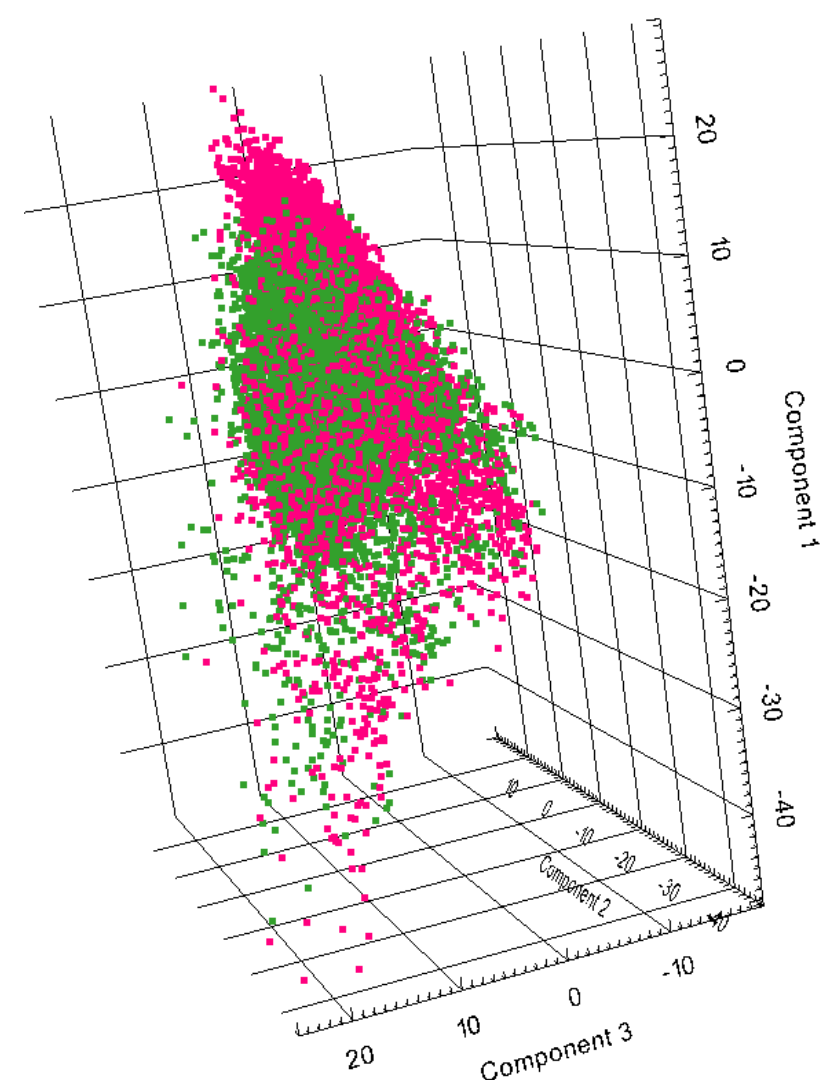

Figure S3: Peptide profiles and principal component analysis (PCA) obtained from two FFPE cell blocks prepared with two automatic processing system. A) Average mass spectrum overlay between FFPE tissue prepared with Sakura Xpress (green) and Sakura VIP (magenta) system. Mass spectra comparison shows similar peptide profile, with several mass intensities higher in the Sakura Xpress compared the Sakura VIP profile. Insets show enlarged  $m/z$  areas where many peak intensity differences between Sakura Xpress and Sakura VIP procedures are visible. B) PCA shows a scores plot between spectra acquired from FFPE tissue processed with Sakura Xpress (green) and Sakura VIP (magenta) system. No cluster segregation is observed between the two types of procedures. Each mark in the plot corresponds to a spectrum in the dataset.

**Table S1.** Sample paraffin processing protocol

| <b>Reagent</b>            | <b>Time (min)</b> | <b>Temperature (°C)</b> | <b>Pressure</b> |
|---------------------------|-------------------|-------------------------|-----------------|
| Formalin                  | 2                 | 40                      | Atm             |
| Ethanol 70%               | 3                 | 45                      | Atm             |
| Ethanol 70%               | 3                 | 45                      | Atm             |
| Isopropanol/Ethanol 80/20 | 2                 | 45                      | Atm             |
| Isopropanol/Ethanol 80/20 | 10                | 45                      | Atm             |
| Isopropanol 100%          | 2                 | 45                      | Atm             |
| Isopropanol 100%          | 10                | 50                      | Atm             |
| Isopropanol 100%          | 0                 | 50                      | Atm             |
| Paraffin                  | 5                 | 63                      | Vacuum          |
| Paraffin                  | 5                 | 63                      | Vacuum          |
| Paraffin                  | 10                | 63                      | Vacuum          |
| Paraffin                  | 15                | 63                      | Vacuum          |

**Table S2.** Comparison of peptide ions (m/z) intensity between Cytospin and FFPE dataset.

| m/z   | Mean Intensity Cytospin | Mean Intensity FFPE | log2 Cytospin/ FFPE | Total number of m/z with Log2 Intensity Cytospin /FFPE > 0 | Total number of m/z with Log2 Intensity Cytospin /FFPE < 0 |
|-------|-------------------------|---------------------|---------------------|------------------------------------------------------------|------------------------------------------------------------|
| 500,5 | 6255,051163             | 2259,316667         | 1,469135191         | 124                                                        | 145                                                        |
| 500,6 | 5452                    | 2123,933333         | 1,360047079         |                                                            |                                                            |
| 501,5 | 17138,1                 | 2633,033333         | 2,702409485         |                                                            |                                                            |
| 501,6 | 14486,62609             | 2476,1              | 2,548580147         |                                                            |                                                            |
| 502,6 | 87177,5439              | 1904,5              | 5,516472365         |                                                            |                                                            |
| 503,6 | 16691,375               | 3439,4              | 2,278873991         |                                                            |                                                            |
| 504,5 | 9968,523529             | 1984,2              | 2,328822387         |                                                            |                                                            |
| 504,6 | 10160,81364             | 2364,7              | 2,10328686          |                                                            |                                                            |
| 506,6 | 55555,493               | 2825,1              | 4,297555723         |                                                            |                                                            |
| 515,4 | 12519,75897             | 7277,9875           | 0,78259531          |                                                            |                                                            |
| 516,3 | 5829,775                | 2999,2              | 0,958862473         |                                                            |                                                            |
| 516,4 | 5265,06                 | 3661,875            | 0,523867427         |                                                            |                                                            |
| 516,5 | 7321,336842             | 3567,435            | 1,037219958         |                                                            |                                                            |
| 516,6 | 7802,84                 | 3323,883333         | 1,231129572         |                                                            |                                                            |
| 517,6 | 4961,806667             | 2114,8              | 1,230344291         |                                                            |                                                            |
| 518,5 | 5718,031884             | 2419,86             | 1,240595081         |                                                            |                                                            |
| 518,6 | 5446,803704             | 2698,4              | 1,013305652         |                                                            |                                                            |
| 519,5 | 5637,74                 | 3327,2              | 0,760808355         |                                                            |                                                            |
| 529,4 | 4178,433333             | 2713,085714         | 0,623027491         |                                                            |                                                            |
| 530,4 | 5184,7                  | 4724,926667         | 0,133968575         |                                                            |                                                            |
| 530,6 | 19335,79                | 3418,772222         | 2,499723499         |                                                            |                                                            |
| 531,5 | 7068,7                  | 3254,466667         | 1,119023777         |                                                            |                                                            |
| 531,6 | 9734,607778             | 2271,2              | 2,099668098         |                                                            |                                                            |
| 533,6 | 10673,79899             | 1874,75             | 2,509303619         |                                                            |                                                            |
| 543,4 | 5203,591304             | 2067,8              | 1,331411002         |                                                            |                                                            |
| 543,5 | 4109,1                  | 2961,28             | 0,472601532         |                                                            |                                                            |

|       |             |             |              |  |  |
|-------|-------------|-------------|--------------|--|--|
| 544,5 | 4261,007143 | 2776,35     | 0,618005018  |  |  |
| 544,6 | 5027,304255 | 2943,436364 | 0,772283567  |  |  |
| 545,5 | 4953,1      | 2141,133333 | 1,20995711   |  |  |
| 545,6 | 5647,671277 | 2060,2      | 1,454871721  |  |  |
| 546,3 | 3530,3      | 3449,75     | 0,033298972  |  |  |
| 546,6 | 3618,6      | 2914,425    | 0,312220365  |  |  |
| 553,4 | 2902,4      | 2473,425    | 0,230736207  |  |  |
| 558,3 | 3475,9      | 2959        | 0,232276881  |  |  |
| 558,4 | 3665,9      | 5175,96     | -0,497659036 |  |  |
| 558,6 | 4465        | 3817,836842 | 0,225904726  |  |  |
| 559,3 | 4799,5      | 3431,3      | 0,48412885   |  |  |
| 559,6 | 9243,932    | 2936,5      | 1,654409009  |  |  |
| 560,6 | 3864        | 2899,666667 | 0,41420803   |  |  |
| 564,6 | 7148,25     | 2411,3      | 1,567778938  |  |  |
| 570,6 | 7217,68     | 2594,133333 | 1,476282549  |  |  |
| 572,6 | 4539,428571 | 3102,9      | 0,548893498  |  |  |
| 573,4 | 3425,3      | 3163,4      | 0,114754359  |  |  |
| 573,6 | 5994,206    | 2946,025    | 1,024798992  |  |  |
| 574,4 | 3292,3      | 2485,15     | 0,405762869  |  |  |
| 574,6 | 2721,2      | 3262,75     | -0,261845455 |  |  |
| 574,7 | 3545,6      | 2230,9      | 0,66840394   |  |  |
| 575,3 | 5312,45     | 4000,9      | 0,409052788  |  |  |
| 575,6 | 5253,947917 | 2567,666667 | 1,032943974  |  |  |
| 577,6 | 14155,19293 | 2154,6      | 2,715839449  |  |  |
| 582,3 | 8243,707071 | 6175,366667 | 0,416768441  |  |  |
| 588,4 | 3264        | 3093,866667 | 0,077230034  |  |  |
| 588,6 | 4985,7      | 2629,966667 | 0,922751561  |  |  |
| 588,7 | 4231,45     | 2397,9      | 0,819380624  |  |  |
| 589,6 | 4962,039506 | 1792        | 1,469362584  |  |  |
| 591,6 | 17187,64235 | 2647,575    | 2,698628204  |  |  |
| 601,6 | 4749,706667 | 2951,7      | 0,686292319  |  |  |

|       |             |             |              |  |  |
|-------|-------------|-------------|--------------|--|--|
| 601,7 | 3878,266667 | 2963,683333 | 0,3880207    |  |  |
| 602,4 | 3586,2      | 4650,8      | -0,375022952 |  |  |
| 602,6 | 4415,25     | 2799,15     | 0,657506329  |  |  |
| 603,4 | 4005,5      | 3535,328571 | 0,180138039  |  |  |
| 603,6 | 4511,4      | 3080,246154 | 0,550529561  |  |  |
| 603,7 | 3768,1      | 2574,114286 | 0,549761145  |  |  |
| 604,6 | 4695,646809 | 2615,7      | 0,844126813  |  |  |
| 604,7 | 4191,5      | 2836,85     | 0,56317676   |  |  |
| 605,7 | 4076,857143 | 2665,9      | 0,612834739  |  |  |
| 615,6 | 3835,066667 | 2873,857143 | 0,416263309  |  |  |
| 616,4 | 3922,233333 | 3091,766667 | 0,34324392   |  |  |
| 616,6 | 4830,66     | 2934,655556 | 0,719029132  |  |  |
| 616,7 | 5434,302105 | 3134,857143 | 0,79369507   |  |  |
| 617,7 | 3299,5      | 2721,18     | 0,278015027  |  |  |
| 619,4 | 4409,8375   | 4638,8      | -0,073026152 |  |  |
| 619,7 | 4692        | 4394,371429 | 0,094546197  |  |  |
| 620,6 | 6931,4      | 1990,7      | 1,799870954  |  |  |
| 628,6 | 4123,5      | 3388,13125  | 0,283379644  |  |  |
| 628,7 | 4659,675    | 3488,614286 | 0,417575238  |  |  |
| 630,4 | 5919,173684 | 4578,333333 | 0,370573285  |  |  |
| 630,7 | 8242,131    | 3954,058824 | 1,05968306   |  |  |
| 632,6 | 3953,4      | 1826,3      | 1,114170161  |  |  |
| 644   | 6010,452941 | 8840,5      | -0,556654253 |  |  |
| 644,1 | 5790,6      | 6033,509091 | -0,059284476 |  |  |
| 644,4 | 4466,9      | 3202        | 0,48030065   |  |  |
| 644,7 | 4509,014103 | 2745,9      | 0,715532936  |  |  |
| 648,4 | 3522,8      | 3359,766667 | 0,068361529  |  |  |
| 648,7 | 4242,823256 | 3021,316667 | 0,489847179  |  |  |
| 650,1 | 6204,330303 | 4948,816667 | 0,326191897  |  |  |
| 658,7 | 6829,604211 | 2265,35     | 1,592068008  |  |  |
| 659,7 | 3952,090909 | 2901,5      | 0,445817204  |  |  |

|       |             |             |              |  |  |
|-------|-------------|-------------|--------------|--|--|
| 660,7 | 3977,785714 | 3041        | 0,387419743  |  |  |
| 664,4 | 5068,374713 | 4764,38     | 0,089234704  |  |  |
| 672,5 | 3084,05     | 3488,7      | -0,177863388 |  |  |
| 672,7 | 4054,425    | 2542,333333 | 0,673344126  |  |  |
| 674,4 | 4127,833333 | 2941,1      | 0,489028883  |  |  |
| 674,7 | 3798,26     | 2697,5      | 0,493715705  |  |  |
| 686,4 | 4072,966667 | 4461,7      | -0,131513504 |  |  |
| 686,7 | 3752,6      | 3924,930769 | -0,064776689 |  |  |
| 686,8 | 3637,233333 | 3545        | 0,037055852  |  |  |
| 687,7 | 11245,20455 | 2569,575    | 2,129708237  |  |  |
| 688,7 | 4651,85     | 2022,7      | 1,201522217  |  |  |
| 699,7 | 5418,225    | 3193,416667 | 0,762719502  |  |  |
| 699,8 | 5432,619277 | 3157,53     | 0,782851504  |  |  |
| 700,5 | 3292,78     | 3439,35     | -0,062829812 |  |  |
| 701,5 | 3944,85     | 5365,935714 | -0,443859327 |  |  |
| 701,7 | 4504,268966 | 5198,795652 | -0,20688447  |  |  |
| 701,8 | 4378,946296 | 5716,43     | -0,384530686 |  |  |
| 703,4 | 4558,202564 | 3744,6      | 0,283653421  |  |  |
| 703,7 | 4483,522222 | 3551,706667 | 0,336120113  |  |  |
| 703,8 | 4365,212281 | 3814,2      | 0,19467132   |  |  |
| 709,4 | 4507,017647 | 4405,85     | 0,03275272   |  |  |
| 713,4 | 3553,878261 | 3359,7      | 0,081061847  |  |  |
| 713,7 | 3900,2      | 3280,51     | 0,249627988  |  |  |
| 713,8 | 3603,475    | 3192,75     | 0,174589245  |  |  |
| 715,5 | 5326,863158 | 5133,876923 | 0,05323751   |  |  |
| 715,8 | 8812,683    | 4192,154545 | 1,071889408  |  |  |
| 716,7 | 3881,5      | 2266,225    | 0,776323183  |  |  |
| 717,8 | 3998,482609 | 3406,35     | 0,231225934  |  |  |
| 727,5 | 3305,9      | 6509,923077 | -0,977597411 |  |  |
| 727,8 | 4573,047253 | 6034,7      | -0,400126226 |  |  |
| 730,8 | 3764        | 3188,8      | 0,239253013  |  |  |



|       |             |             |              |  |  |
|-------|-------------|-------------|--------------|--|--|
| 731,7 | 3617,1      | 2918,833333 | 0,309441649  |  |  |
| 737,4 | 4160,233333 | 4408,1      | -0,083492506 |  |  |
| 738,4 | 3590,4      | 4737,35     | -0,399935683 |  |  |
| 742,8 | 3797,35     | 3561,388889 | 0,092552997  |  |  |
| 743,8 | 4602,544048 | 3577        | 0,36368141   |  |  |
| 746,5 | 3917,5      | 3978,5      | -0,022291324 |  |  |
| 755,8 | 3428,04     | 4045,1      | -0,238791425 |  |  |
| 756,8 | 3924,71875  | 3266,742857 | 0,264736375  |  |  |
| 758,8 | 3862,438889 | 3595,976923 | 0,103128345  |  |  |
| 770,8 | 3725,99     | 2893,3      | 0,364907881  |  |  |
| 771,5 | 3517,028571 | 4870,222222 | -0,469630547 |  |  |
| 771,8 | 3187,575    | 3924,317647 | -0,299982535 |  |  |
| 772,8 | 3956,203226 | 4045,875    | -0,03233521  |  |  |
| 773,5 | 3003,371429 | 3675,314286 | -0,291284719 |  |  |
| 773,8 | 3904,55     | 3492,345455 | 0,160960013  |  |  |
| 786,5 | 3379,831579 | 3219,966667 | 0,069905604  |  |  |
| 786,8 | 3845,425    | 4043,673333 | -0,072523399 |  |  |
| 786,9 | 3448,8      | 3602,15     | -0,062763791 |  |  |
| 788,5 | 3903,590909 | 5369,4      | -0,459959016 |  |  |
| 789,5 | 3412,955556 | 3236,4      | 0,0766317    |  |  |
| 799,8 | 3639,2      | 3187        | 0,191422321  |  |  |
| 800,8 | 3511,25     | 3709,7      | -0,079317803 |  |  |
| 801,5 | 2850        | 3340,4      | -0,229058951 |  |  |
| 802,5 | 3844,142857 | 4307,05     | -0,164038121 |  |  |
| 802,9 | 3877,8      | 4039,8      | -0,059045473 |  |  |
| 805,5 | 3704,1      | 3785,333333 | -0,031297301 |  |  |
| 806,5 | 3137,833333 | 3641,066667 | -0,214592431 |  |  |
| 812,5 | 4652,976768 | 5090,366667 | -0,129615596 |  |  |
| 812,9 | 3115,1      | 4547,025    | -0,545644459 |  |  |
| 813,5 | 3177        | 3894,1      | -0,293624843 |  |  |
| 814,9 | 3234,033333 | 3341,45     | -0,047139738 |  |  |

|       |             |             |              |  |  |
|-------|-------------|-------------|--------------|--|--|
| 815,5 | 3823,385185 | 3733,45     | 0,034341141  |  |  |
| 815,8 | 2557,8      | 3641,1      | -0,509470903 |  |  |
| 815,9 | 3407,7      | 3892,875    | -0,192037688 |  |  |
| 816,5 | 9617,904    | 9570,08     | 0,007191541  |  |  |
| 819,5 | 3329,7      | 3777,1      | -0,181886781 |  |  |
| 820,5 | 3955,5      | 5412,6      | -0,452461703 |  |  |
| 827,9 | 3393,9      | 3555,75     | -0,067209837 |  |  |
| 828,5 | 2680,5      | 4791,825    | -0,838073086 |  |  |
| 831,5 | 3902,130303 | 4599,25     | -0,237136666 |  |  |
| 831,9 | 3836,3      | 4385,7      | -0,193091585 |  |  |
| 837,5 | 4249,647191 | 4665,5      | -0,13468863  |  |  |
| 838,5 | 3555,7      | 4177,3      | -0,23243715  |  |  |
| 839,5 | 3733,1      | 5176,2      | -0,471519207 |  |  |
| 839,6 | 2225,5      | 4132,771429 | -0,892980074 |  |  |
| 842,5 | 16122,01667 | 6683,25     | 1,270410471  |  |  |
| 842,6 | 15229,51875 | 13973,91111 | 0,124134485  |  |  |
| 844,9 | 2468,2      | 3809,6      | -0,626180224 |  |  |
| 845,5 | 3514,9      | 4778,6      | -0,443104365 |  |  |
| 850,5 | 3773,98     | 3191,5      | 0,24185213   |  |  |
| 850,6 | 3170,2      | 3893,066667 | -0,296333191 |  |  |
| 853,5 | 3841,8      | 4586        | -0,255453939 |  |  |
| 854,5 | 5751        | 4668        | 0,301008277  |  |  |
| 855,1 | 6124,93     | 7128,26     | -0,218856603 |  |  |
| 856,6 | 3614,05     | 5523,4      | -0,611940144 |  |  |
| 856,9 | 2443,9      | 4764,8      | -0,963230405 |  |  |
| 857,6 | 3121,042857 | 3442        | -0,141218929 |  |  |
| 857,9 | 3339,4      | 4405,688889 | -0,399778709 |  |  |
| 859,5 | 3808,7      | 4065,7      | -0,09420511  |  |  |
| 861,1 | 4249,7      | 4377,9      | -0,042878    |  |  |
| 869,9 | 3447,075    | 2712,5      | 0,345749551  |  |  |
| 870,6 | 5156,895918 | 5451,583333 | -0,080172373 |  |  |

|        |             |             |              |  |  |
|--------|-------------|-------------|--------------|--|--|
| 870,9  | 3512,9      | 4716,253333 | -0,424978706 |  |  |
| 874,5  | 3234,24     | 4931,8      | -0,608687556 |  |  |
| 874,6  | 2093        | 4260,333333 | -1,025394001 |  |  |
| 900,6  | 4129,636842 | 4778,62     | -0,21057913  |  |  |
| 901,5  | 6011,996429 | 6609,1      | -0,136609673 |  |  |
| 901,6  | 6084,713636 | 6468,9      | -0,088331044 |  |  |
| 912,6  | 2029,9      | 4253,3      | -1,06717396  |  |  |
| 915,6  | 2824,56     | 5217,45     | -0,885318723 |  |  |
| 919,5  | 3133,3      | 3256,6      | -0,05568362  |  |  |
| 920,5  | 2727,633333 | 4904,7      | -0,846515175 |  |  |
| 929,6  | 2992,9      | 4875,775    | -0,704087476 |  |  |
| 940,5  | 5432,563514 | 5561,25     | -0,033776057 |  |  |
| 940,6  | 5123,461538 | 8044,1      | -0,650812156 |  |  |
| 942,6  | 3011,9      | 4619,15     | -0,616953525 |  |  |
| 943,6  | 3886,812963 | 5820,175    | -0,582474847 |  |  |
| 944,6  | 14449,563   | 10483       | 0,462974219  |  |  |
| 955,6  | 2842,513636 | 5086,3      | -0,839449287 |  |  |
| 957,6  | 5994,13     | 7182,875    | -0,261011036 |  |  |
| 958,6  | 3281,3      | 4229,033333 | -0,36606043  |  |  |
| 959,6  | 2720,277778 | 5585,9      | -1,038035768 |  |  |
| 960,6  | 3318        | 4812,32     | -0,536418693 |  |  |
| 967,6  | 4781,72766  | 5622,133333 | -0,233585704 |  |  |
| 971,6  | 5666,575    | 5883,15     | -0,054111818 |  |  |
| 976,5  | 3464,227778 | 6516,075    | -0,911469417 |  |  |
| 982,6  | 2795,69     | 4843,45     | -0,792830652 |  |  |
| 983,6  | 2204,6      | 4841,8      | -1,135026569 |  |  |
| 985,6  | 4449,481522 | 6056,3      | -0,444799436 |  |  |
| 985,7  | 5205,5      | 7275,136364 | -0,482937546 |  |  |
| 1007,6 | 3016,85     | 3414,9      | -0,178800366 |  |  |
| 1013,5 | 3051,673913 | 4823,8      | -0,660569282 |  |  |
| 1013,6 | 1897        | 4317,85     | -1,186593447 |  |  |

|        |             |             |              |  |  |
|--------|-------------|-------------|--------------|--|--|
| 1014,5 | 2286,95     | 3872,6      | -0,759877669 |  |  |
| 1018,6 | 3264,4      | 5981,3      | -0,873641232 |  |  |
| 1024,7 | 2515,35     | 4866,04     | -0,951989021 |  |  |
| 1025,7 | 2407,45     | 4145,3      | -0,78397068  |  |  |
| 1028,6 | 3396,587805 | 4913,3      | -0,532606181 |  |  |
| 1028,7 | 3838,346939 | 5217,4375   | -0,442856294 |  |  |
| 1032,6 | 4692,956322 | 4947,95     | -0,076333889 |  |  |
| 1032,7 | 3959,518182 | 6531,58     | -0,722107139 |  |  |
| 1039,6 | 2982,085    | 5246,6      | -0,815061423 |  |  |
| 1045,6 | 6955,560606 | 5238        | 0,409150738  |  |  |
| 1045,7 | 6285,5      | 6676,316667 | -0,087024872 |  |  |
| 1060,1 | 3278,035294 | 4979,7      | -0,603227443 |  |  |
| 1066,1 | 3696,090476 | 4669,833333 | -0,337370988 |  |  |
| 1071,6 | 2315,757143 | 5035,133333 | -1,120546019 |  |  |
| 1103,7 | 2389,233333 | 5167,55     | -1,112932688 |  |  |
| 1132,6 | 2567,268571 | 4824,066667 | -0,910015615 |  |  |
| 1140,6 | 2255,3      | 4840        | -1,101687694 |  |  |
| 1140,7 | 2101,9      | 5068,566667 | -1,269883794 |  |  |
| 1191,7 | 2255,5      | 5427,8      | -1,266920276 |  |  |
| 1198,7 | 4702,45     | 7597,7      | -0,692150143 |  |  |
| 1198,8 | 6169,01625  | 8455,8      | -0,454900807 |  |  |
| 1203,7 | 2308,554839 | 5440,8      | -1,236828794 |  |  |
| 1220,7 | 2022,02     | 3871,1      | -0,936946309 |  |  |
| 1228,7 | 1945,9      | 3886,4      | -0,997996823 |  |  |
| 1231,7 | 2368,420833 | 5832,35     | -1,300151849 |  |  |
| 1232,7 | 2352,802222 | 4996,9      | -1,086653295 |  |  |
| 1233,7 | 2131,075    | 4497,9      | -1,077670219 |  |  |
| 1260,7 | 2329,4      | 4620,8      | -0,98818425  |  |  |
| 1269,8 | 2309,907143 | 5658,2      | -1,292508315 |  |  |
| 1270,7 | 1905,25     | 4691        | -1,299915185 |  |  |
| 1271,1 | 2153,55     | 3968,7      | -0,881949691 |  |  |

|        |             |             |              |  |  |
|--------|-------------|-------------|--------------|--|--|
| 1299,7 | 1616,6      | 4700        | -1,539698004 |  |  |
| 1299,8 | 1919,2      | 4769,7      | -1,313393465 |  |  |
| 1325,8 | 6568,983    | 6009,325    | 0,128467083  |  |  |
| 1334,7 | 2009,990909 | 5304,45     | -1,400014195 |  |  |
| 1341,8 | 1639,8      | 5005,4      | -1,609965499 |  |  |
| 1349,7 | 1802,033333 | 4219,8      | -1,227548925 |  |  |
| 1349,8 | 1882,6      | 5922        | -1,65335799  |  |  |
| 1361,7 | 1984,23     | 4636,7      | -1,224519122 |  |  |
| 1362,8 | 1958,6      | 4270,7      | -1,124649768 |  |  |
| 1366,6 | 2335,2      | 4896,4      | -1,068175305 |  |  |
| 1366,7 | 2313,992308 | 5163,3      | -1,157909356 |  |  |
| 1377,7 | 2080,421875 | 6413,4      | -1,624213277 |  |  |
| 1399,8 | 1852,866667 | 5657,1      | -1,610303606 |  |  |
| 1428,8 | 1909,821429 | 5217,6      | -1,449948596 |  |  |
| 1475,9 | 1915,30625  | 4924,5      | -1,362402159 |  |  |
| 1476   | 1338,8      | 4980        | -1,895205286 |  |  |
| 1489,9 | 2041,357895 | 4359,7      | -1,094699723 |  |  |
| 1490   | 2091,104167 | 4952,3      | -1,243833782 |  |  |
| 1505,9 | 2273,626744 | 5251,6      | -1,207761604 |  |  |
| 1506   | 1041,5      | 3814,1      | -1,87267983  |  |  |
| 1542,8 | 1994,196552 | 5201,666667 | -1,38316634  |  |  |
| 1628,9 | 1523,809091 | 5036,6      | -1,724767991 |  |  |
| 1629,9 | 1357,2      | 3317,8      | -1,289593587 |  |  |
| 1790,9 | 1582,181818 | 4789,9      | -1,598080139 |  |  |
| 1791   | 1548,028571 | 6583,45     | -2,088411715 |  |  |
| 1976,1 | 1336,090909 | 4105        | -1,619364048 |  |  |

\* Number of spectra used for each dataset = 69.
